# Supplementary material for: Cordycepin Resensitizes T24R2 Cisplatin-Resistant Human Bladder Cancer Cells to Cisplatin by Inactivating Ets-1 Dependent MDR1 Transcription
Source: MDPI journal article supplement (doi:10.3390/ijms21051710), 2020-03-02
Supplement: s1 [file s1]

## Supplementary Materials

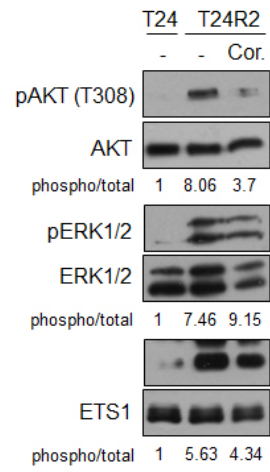

Figure S1. Cordycepin inhibits active phosphorylation of AKT. The relative ratios of phosphorylated form to total form have been determined in Image J.
